# Supplementary material for: Retinoic acid orchestrates fibroblast growth factor signalling to drive embryonic stem cell differentiation
Source: Oxford University Press journal article supplement (doi:10.1242/dev.043117), 2010-02-23
Supplement: dev043117tables1.pdf [file dev043117tables1.pdf]

**Table S1. qPCR primer sequences**

| Gene           | Forward primer (5'-3') | Reverse primer (5'-3') | Annealing temperature (°C) |
|----------------|------------------------|------------------------|----------------------------|
| Rarb           | CTGACCACCGGGTCCGAT     | GTATACCTGGTACAAATTCTG  | 65                         |
| Fgf4           | CTACTGCAACGTGGGCATC    | TCGGTAAAGAAAGGCACACC   | 57                         |
| Fgf8           | CATCAGCGCGAGGTGCACTTC  | CGTGAAGGGCGGGTAGTTGAG  | 65                         |
| Fgf5           | TGTA CTGCAGAGTGGGCATC  | TAAATTTGGCACTTG CATGG  | 60                         |
| Oct4           | GAGAGTGAAGATGCCAGCAC   | AGCTGGACCTGGTGAAGATG   | 57                         |
| Rex1           | CCCTCGACAGACTGACCCTAA  | TCGGGGCTAATCTCACTTTCAT | 57                         |
| Nanog          | ATGCCTGCAGTTTTTCATCC   | ACAGTCCGCATCTTCTGCTT   | 57                         |
| Klf4           | GTGCCCCGACTAACC GTTG   | GTCGTTGAACTCCTCGGTCT   | 57                         |
| Ngn2           | CCA ACTCCACGTCCCCATA   | AGGCGCATAACGATGCTTCT   | 57                         |
| Mash1          | CAACCGGGTCAAGTTGGTC    | GTCGTTGGAGTAGTTGGGG    | 57                         |
| Sprouty2       | TCCAAGAGATGCCCTTACCCA  | GCAGACCGTGGAGTCTTTCA   | 57                         |
| Dusp1          | TCAGGAACGTGCGCTTCAG    | TCAGCGTTGGGCACGATATG   | 65                         |
| Dusp2          | TTCTCAATGTCTCTGCCAGC   | GAACCAGGCACTTATCTCCA   | 65                         |
| Dusp6          | CAGCGACTGGAATGAGAACA   | CAATGTCCGAGGAAGAGTCC   | 55                         |
| Fgfr1          | CACTCTCTGCACTGCCAGG    | GGGTGGACCAGGAGAGAC     | 65                         |
| Fgfr2          | TCCAACGCCCAATGAGG      | TCCGACCACCGTGGAGGC     | 65                         |
| Fgfr3          | GCCTGAACCTAGCCAG       | CCTTAGCCCAGACCGTG      | 63                         |
| $\beta$ -actin | GGCTGTATTCCCCTCCATCG   | CCAGTTGGTAACAATGCCATGT | 57                         |
