# Supplementary figures and images for: Retinoic acid orchestrates fibroblast growth factor signalling to drive embryonic stem cell differentiation
Source: Oxford University Press journal article supplement (doi:10.1242/dev.043117), 2010-02-23

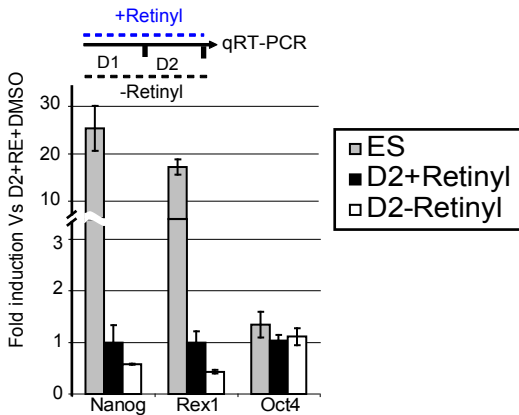

Supplement: dev043117-sup-043117figs1.pdf [file dev043117-sup-043117figs1.pdf]

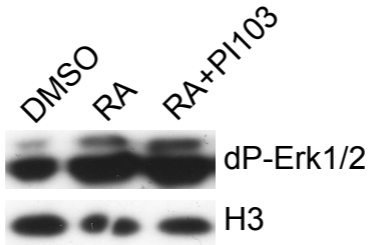

Supplement: dev043117-sup-043117figs2.pdf [file dev043117-sup-043117figs2.pdf]

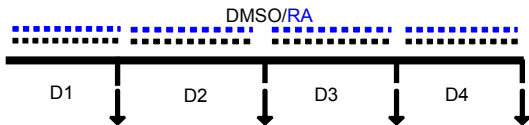

Immunoblotting/Flow cytometry for Sox1GFP

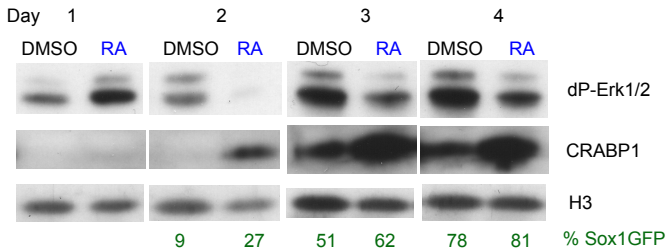

Supplement: dev043117-sup-043117figs3.pdf [file dev043117-sup-043117figs3.pdf]

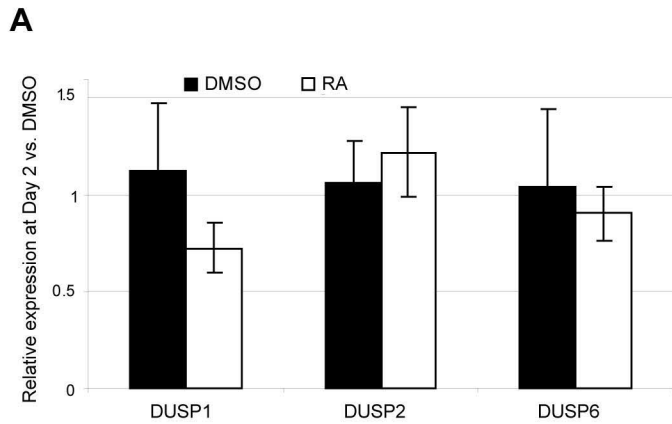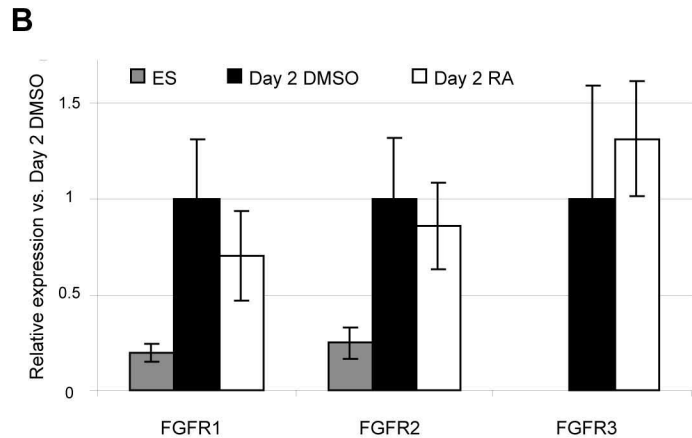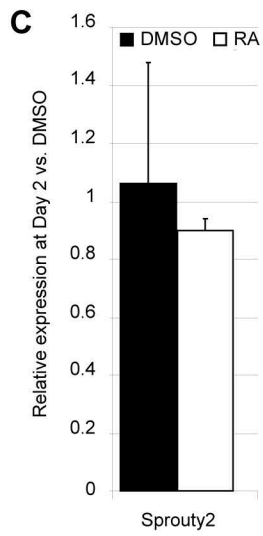

Supplement: dev043117-sup-043117figs4.pdf [file dev043117-sup-043117figs4.pdf]
